# Supplementary material for: π-Conjugated thiolate amplified spectrophotometry nitrite assay with improved sensitivity and accuracy
Source: Royal Society of Chemistry journal article supplement (doi:10.1039/c8cc06477f), 2018-01-01
Supplement: c8cc06477f1.pdf [file c8cc06477f1.pdf]

## Supporting Information

### $\pi$ -Conjugated thiolate amplified spectrophotometry nitrite assay with improved sensitivity and accuracy

Lijuan Zhang, Xiaoxia Wu, Zhiqin Yuan\* and Chao Lu\*

State Key Laboratory of Chemical Resource Engineering, Beijing University of Chemical Technology, Beijing 100029, China.

E-mail: yuanzq@mail.buct.edu.cn (Z. Yuan)

E-mail: luchao@mail.buct.edu.cn (C. Lu)

#### Experimental Section

**Chemicals.** Sodium nitrite ( $\text{NaNO}_2$ ), sodium nitrate ( $\text{NaNO}_3$ ), sodium dihydrogen phosphate ( $\text{NaH}_2\text{PO}_4$ ), sodium sulfate ( $\text{Na}_2\text{SO}_4$ ), sodium periodate ( $\text{NaIO}_4$ ), sodium perchlorate ( $\text{NaClO}_4$ ), sodium fluoride ( $\text{NaF}$ ), sodium chloride ( $\text{NaCl}$ ), sodium bromide ( $\text{NaBr}$ ), sodium thiosulfate ( $\text{Na}_2\text{S}_2\text{O}_3$ ), and sodium acetate ( $\text{NaAcO}$ ) were obtained from Tianjin Fuchen Chemical Reagent Co., Ltd. (Tianjin, China). Sodium hypochlorite ( $\text{NaClO}$ ) were acquired XiLong Scientific. Hydrochloric acid ( $\text{HCl}$ , 36%, V/V) and Hydrogen peroxide ( $\text{H}_2\text{O}_2$ , 30% wt) were supplied by Beijing Chemical Reagent Company (Beijing, China). Glutathione (GSH) and 4-amino-6-hydroxy-2-mercaptopyrimidine (AHMP) were purchased from Tokyo Chemical Industry. (Tokyo, Japan). 2-Thiobarbituric acid (TBA) was obtained from Alfa Aesar (Heysham, U.K.). Tiopronin (TPN) was supplied form Shanghai Yuanye Biological (Shanghai, China). Thioacetamide was provided from J&k Scientific Ltd. (Beijing, China). All reagents were analytical grade and used without further purification. Deionized water was from

a Millipore water purification system (18.2 MU cm, Milli Q, Millipore, Barnstead, CA, USA).

**Characterizations.** The UV-vis absorption spectra were collected with a UV-3600 spectrophotometer (Shimadzu, Japan). Fourier-transform infrared (FT-IR) spectra were obtained using a Nicolet 6700 FT-IR spectrometer (Thermo, U.S.A.). The cyclic voltammetry electrochemical measurements were conducted by a CHI660E electrochemical workstation (Shanghai Chenhua Instruments, China). The ESI-MS analyses was performed with a Xevo G2 Q-ToF mass spectrometer (Waters, USA)

**UV-vis absorption measurements.** A series of sodium nitrite, TBA, GSH, AHMP and TPN stock solutions were prepared for use, the reaction was conducted under acidic conditions (pH = 3.0). Separated TBA, GSH, AHMP, TPN was mixed with sodium nitrite solution and the corresponding absorption spectrum was measured.

**Electrospray ionization mass spectrometry (ESI-MS) measurement.** Typically, 10 mM TBA was reacted with sodium nitrite and the resulted solution was freeze-dried. A 5.7 mg of powder in 10 mL of methanol with 100-fold dilution was centrifuged at 1000 r/min for 5 minutes, and the supernatant was taken for mass spectrometry measurement. The mass spectrum of RSNO<sub>TBA</sub> was performed with a negative mode. The capillary electrospray voltage was 2.2 kV, and the sample cone was 30 V. The solvent system consisted of 25% water (A) and 75% acetonitrile (B) with a flow rate of 100  $\mu\text{L}\cdot\text{min}^{-1}$ .

**Cyclic voltammetry measurements.** A conventional three-electrode system was used for cyclic voltammetry determination. The reference electrode saturated was Ag/AgCl electrode, platinum wire as the counter electrode and the working electrode was glassy carbon electrode (GCE). The electrolyte was prepared with 0.1 M PBS (pH=7.4). The RSNO modified GCE was prepared by dropping the mixture of

thiolate and  $\text{NaNO}_2$  on the surface of electrode, the scanning voltage ranged from -1.0 V to 1.0 V. For  $\text{RSNO}_{\text{GSH}}$ , the scanning voltage ranged from -1.7 V to 1.6 V. While for  $\text{RSNO}_{\text{TPN}}$ , the scanning voltage ranged from -1.9 V to 1.7 V. All the surface of electrode was dried *via* ultrapure  $\text{N}_2$  blow, the scan rate was 100 mV/s.

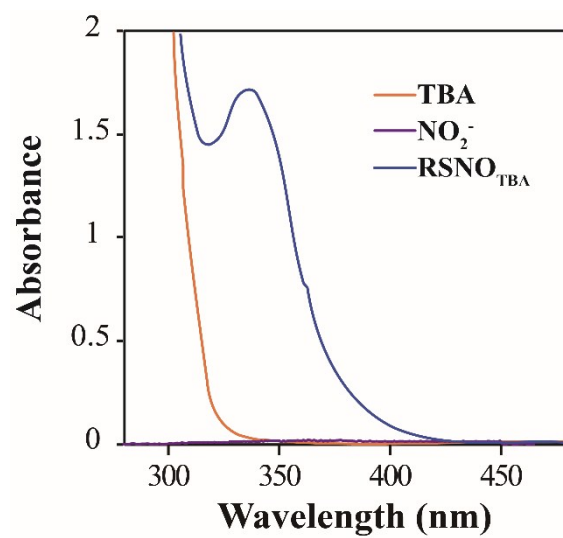

**Fig. S1** UV-vis absorption spectra of TBA (1.0 mM, orange line),  $\text{NaNO}_2$  (200  $\mu\text{M}$ , purple line),  $\text{RSNO}_{\text{TBA}}$  (200  $\mu\text{M}$ , blue line).

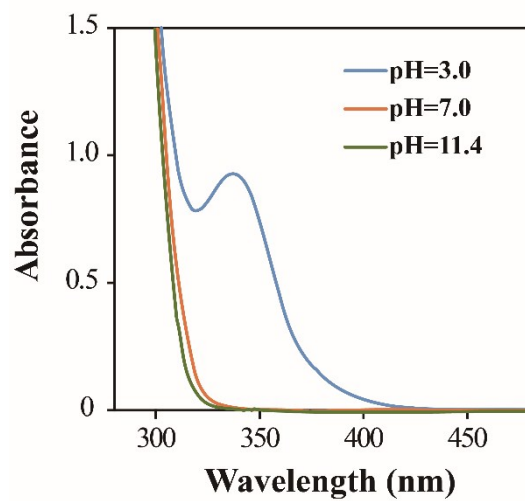

**Fig. S2** UV-vis absorption spectra of TBA-NaNO<sub>2</sub> solutions under different pH conditions.

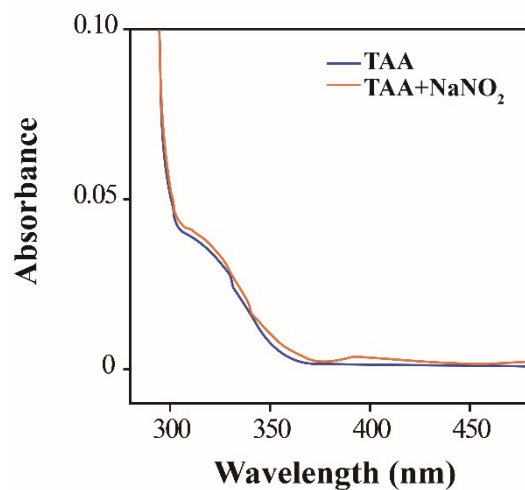

**Fig. S3** UV-vis absorption spectra of thioacetamide (TAA, 1 mM, blue line) and TAA-NaNO<sub>2</sub> (orange line, NaNO<sub>2</sub>: 200 μM) solution.

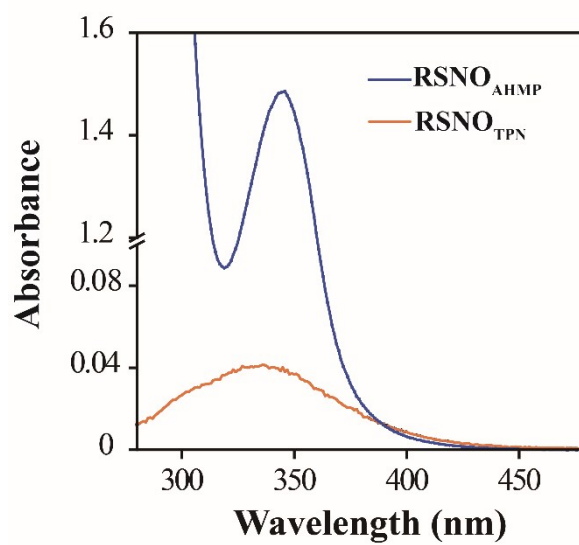

**Fig. S4** UV-vis absorption spectra of 200  $\mu$ M RSNO<sub>AHMP</sub> (blue line) and RSNO<sub>TPN</sub> (orange line).

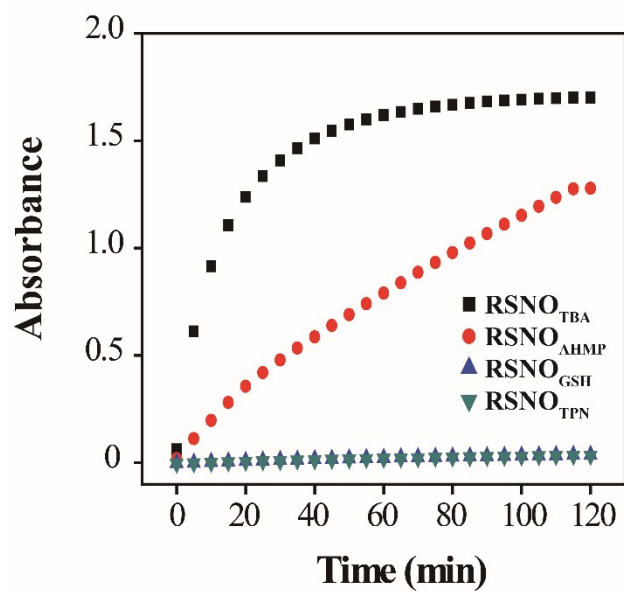

**Fig. S5** Time-dependent absorbance at corresponding maximum absorption wavelength of four RSNOs. The concentrations of 200  $\mu\text{M}$   $\text{NaNO}_2$  and TBA, AHMP, GSH and TPN are 1, 1, 1, and 1 mM, respectively.



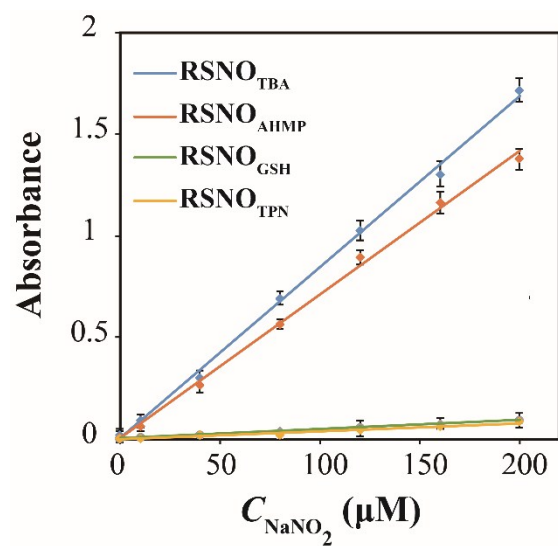

**Fig. S6** Absorbance of various RSNOs at corresponding maximum absorption wavelengths versus the concentration of nitrite from 0 to 200  $\mu\text{M}$ . The concentrations of GSH, TPN, TBA and AHMP are 5, 5, 1, and 1 mM, respectively.

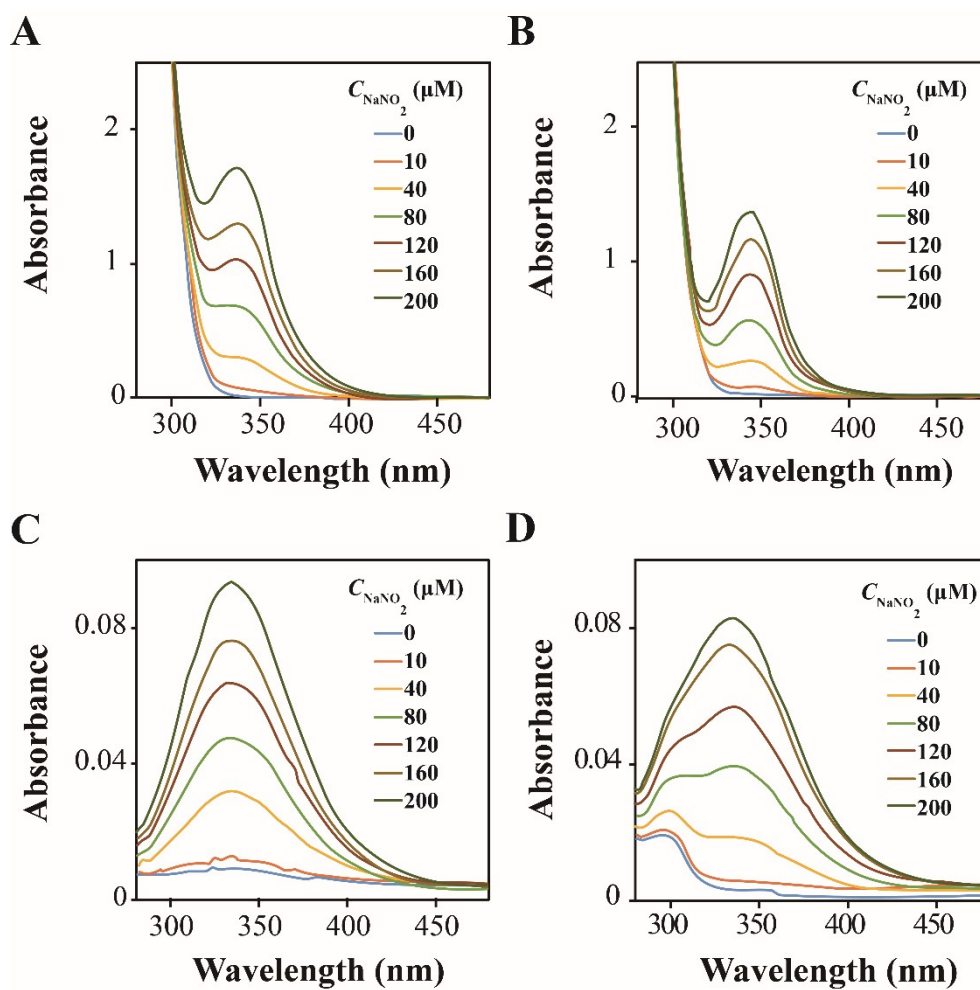

**Fig. S7** UV-vis absorption spectra of RSNO<sub>TBA</sub> (A), RSNO<sub>AHMP</sub> (B), RSNO<sub>GSH</sub> (C), and RSNO<sub>TPN</sub> (D) *versus* the concentration of nitrite from 0 to 100  $\mu\text{M}$ . The concentrations of TBA, AHMP, GSH and TPN are 1, 1, 5, and 5 mM, respectively.

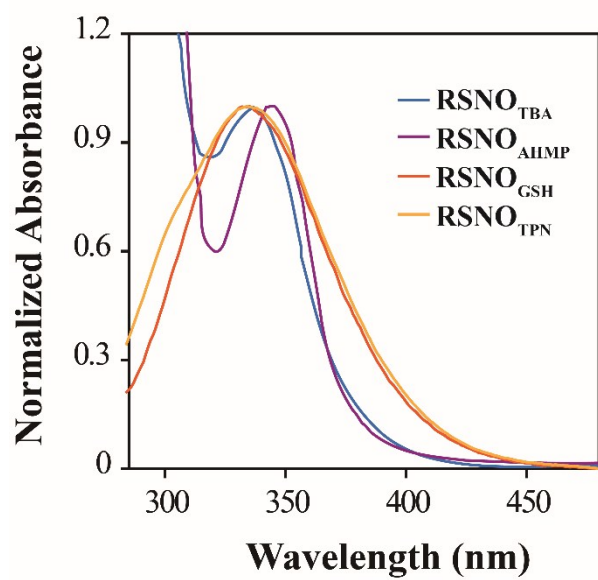

**Fig. S8** Normalized UV-vis absorption spectra of RSNO<sub>TBA</sub>, RSNO<sub>AHMP</sub>, RSNO<sub>GSH</sub>, and RSNO<sub>TPN</sub>.

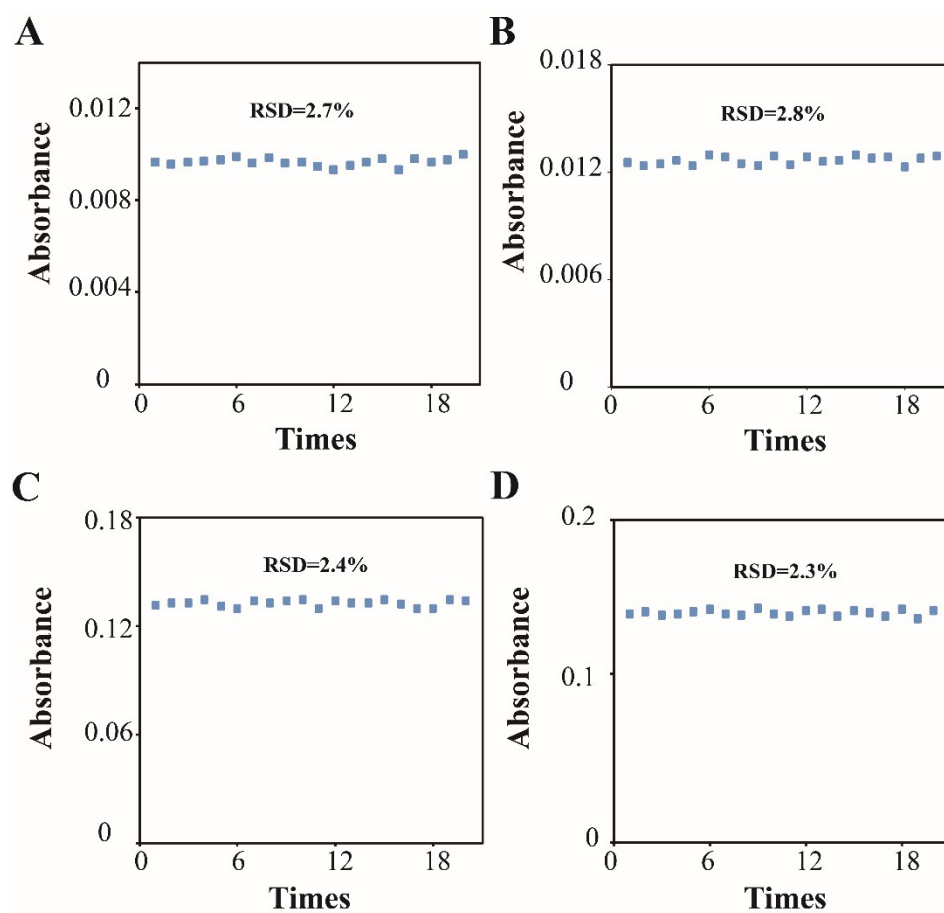

**Fig. S9** The absorbance signals of thiol compounds- $\text{NaNO}_2$  solutions for 20 repeated measurements. (A) 5 mM TPN and 20  $\mu\text{M}$   $\text{NaNO}_2$ , (B) 5 mM GSH and 20  $\mu\text{M}$   $\text{NaNO}_2$ , (C) 1 mM AHMP and 20  $\mu\text{M}$   $\text{NaNO}_2$ , and (D) 1 mM TBA and 20  $\mu\text{M}$   $\text{NaNO}_2$ .

**Table S1.** The calculated energy gaps, potentials and molar absorption coefficients of S-nitrosothiol compounds.

| Samples              | $E_{\text{OX}} / \text{V}$ | $E_{\text{HOMO}} / \text{eV}$ | $E_{\text{Red}} / \text{V}$ | $E_{\text{LUMO}} / \text{eV}$ | $E_{\text{g}} / \text{eV}$ | $\epsilon (\text{cm}^{-1} \cdot \text{mol}^{-1})$ |
|----------------------|----------------------------|-------------------------------|-----------------------------|-------------------------------|----------------------------|---------------------------------------------------|
| RSNO <sub>TBA</sub>  | 0.05                       | -4.76                         | -0.12                       | -4.59                         | 0.17                       | $1.8 \times 10^4$                                 |
| RSNO <sub>AHMP</sub> | 0.05                       | -4.76                         | -0.19                       | -4.52                         | 0.24                       | $1.3 \times 10^4$                                 |
| RSNO <sub>GSH</sub>  | 1.36                       | -6.02                         | -1.64                       | -3.08                         | 3.00                       | $9.1 \times 10^2$                                 |
| RSNO <sub>TPN</sub>  | 1.51                       | -6.22                         | -1.71                       | -3.00                         | 3.22                       | $8.2 \times 10^2$                                 |

**Table S2.** Comparison of this work with some established nitrite detection methods.

| Method                     | Material                              | Detection limit | Linear range | Ref |
|----------------------------|---------------------------------------|-----------------|--------------|-----|
| Colorimetric detection     | μPAD                                  | 1μM             | 10-150μM     | 1   |
|                            | GNRs                                  | 0.5μM           | 1-15μM       | 2   |
|                            | TMB                                   | 1μM             | 0.5-30μM     | 3   |
|                            | AuNPs-rGO                             | 0.1μM           | 1-20μM       | 4   |
|                            | AuNPs                                 | 1μM             | 0-200μM      | 5   |
| Fluorescence Detection     | N-CNDs                                | 1μM             | 0-1mM        | 6   |
|                            | Fe <sub>3</sub> O <sub>4</sub> @Rh 6G | 0.8μM           | 1-50μM       | 7   |
|                            | Azo-based probe                       | 0.6 μM          | 0.3–3.0 μM   | 8   |
| Electrochemical detection  | ZnP-C <sub>60</sub>                   | 1.44μM          | 2-164μM      | 9   |
| UV resonance Raman spectra | WWTPs                                 | <14μM           | 7-3500μM     | 10  |

### References

- 1 B. M. Jayawardane, S. Wei, I. D. McKelvie and S. D. Kolev, *Anal Chem*, 2014, **86**, 7274-7279.
- 2 Z. Chen, Z. Zhang, C. Qu, D. Pan and L. Chen, *Analyst*, 2012, **137**, 5197-5200.
- 3 J. Zhang, C. Yang, C. Chen and X. Yang, *Analyst*, 2013, **138**, 2398-2404.
- 4 B. Amanulla, S. Palanisamy, S. M. Chen, T. W. Chiu, V. Velusamy, J. M. Hall, T. W. Chen and S. K. Ramaraj, *Sci. Rep.*, 2017, **7**, 14182.
- 5 Y. Y. Ye, Guo, Y. Yue and Y. Zhang, *Anal. Methods*, 2015, **7**, 4090-4096.
- 6 H. Zhang, S. Kang, G. Wang, Y. Zhang and H. Zhao, *ACS Sens.*, 2016, **1**, 875-881.
- 7 Y. Zhang, Z. Su, B. Li, L. Zhang, D. Fan and H. Ma, *ACS Appl. Mater. Interfaces*, 2016, **8**, 12344-12351.
- 8 A. Chatterjee, D. G. Khandare, P. Saini, A. Chattopadhyay, M. S. Majik and M. Banerjee, *RSC Adv.*, 2015, **5**, 31479-31484.
- 9 H. Wu, S. Fan, X. Jin, H. Zhang, H. Chen, Z. Dai and X. Zou, *Anal. Chem.*, 2014, **86**, 6285-6290.
- 10 A. Ianoul, T. Coleman and S. A. Asher, *Anal. Chem.*, 2002, **74**, 1458-1461.
